# Supplementary material for: Relationships between neuropsychological and antisaccade measures in multiple sclerosis patients
Source: PubMed Central journal article supplement (PMC6174870; doi:10.7717/peerj.5737), 2018-10-04
Supplement: peerj-06-5737-s002.pdf [file peerj-06-5737-s002.pdf]

## Latency analysis

### R code

```
setwd("~/Desktop")
data = read.csv2(file = "nome1.csv", sep = ",", dec = ".")
library(nlme)
library(lsmmeans)
library(multcomp)

# model for latency
model = lme(out_latency ~ group * factor(sac_type) + factor(trial_direction), random =
~1 | id_aaa, data = data)
summary(model)
```

### R output

```
Linear mixed-effects model fit by REML
Data: data
      AIC      BIC    logLik
25899.58 25951.76 -12940.79

Random effects:
Formula: ~1 | id_aaa
(Intercept) Residual
StdDev:     35.9196 46.52142

Fixed effects: out_latency ~ group * factor(sac_type) + factor(trial_direction)
              Value Std.Error DF t-value p-value
(Intercept)  209.32477  7.391202 2362 28.320801 0.0000
groupM       9.73365 10.070463  74 0.966554 0.3369
factor(sac_type)2 -50.59558  6.024032 2362 -8.398957 0.0000
factor(sac_type)3  76.35367  4.719172 2362 16.179463 0.0000
factor(trial_direction)2 -10.01256  1.902614 2362 -5.262529 0.0000
groupM:factor(sac_type)2  2.81405  7.790842 2362 0.361200 0.7180
groupM:factor(sac_type)3 34.41149  6.283663 2362 5.476343 0.0000
Correlation:
              (Intr) groupM fctr(s_)2 fc(_)3 fctr(t_)2 gM:(_)2
groupM       -0.721
factor(sac_type)2 -0.425 0.311
factor(sac_type)3 -0.570 0.416 0.663
factor(trial_direction)2 -0.143 0.017 0.013 0.028
groupM:factor(sac_type)2 0.327 -0.403 -0.773 -0.513 0.000
groupM:factor(sac_type)3 0.430 -0.537 -0.498 -0.751 -0.030 0.646

Standardized Within-Group Residuals:
      Min      Q1      Med      Q3      Max
-4.2917151 -0.6400065 -0.1147621 0.5551761 4.4036597

Number of Observations: 2443
Number of Groups: 76
```

|                        |
|------------------------|
| saccade type           |
| 1 = pro saccade        |
| 2 = corrective         |
| 3 = antisaccade        |
| C = control            |
| M = Multiple Sclerosis |

### Latency pairwise comparisons

```
> # comparing by group*saccade type  
> summary(glht(model, lsm(pairwise ~ group*sac_type)))  
Note: df set
```

saccade type: 1 = pro saccade; 2 = corrective  
3 = antisaccade; C = control; M = Multiple Sclerosis

Simultaneous Tests for General Linear Hypotheses

```
Fit: lme.formula(fixed = out_latency ~ group * factor(sac_type) +  
factor(trial_direction), data = data, random = ~1 | id_aaa)
```

Linear Hypotheses:

|                | Estimate | Std. Error | t value | Pr(> t ) |     |
|----------------|----------|------------|---------|----------|-----|
| C,1 - M,1 == 0 | -9.734   | 10.070     | -0.967  | 0.91058  |     |
| C,1 - C,2 == 0 | 50.596   | 6.024      | 8.399   | < 1e-04  | *** |
| C,1 - M,2 == 0 | 38.048   | 10.021     | 3.797   | 0.00159  | **  |
| C,1 - C,3 == 0 | -76.354  | 4.719      | -16.179 | < 1e-04  | *** |
| C,1 - M,3 == 0 | -120.499 | 9.498      | -12.686 | < 1e-04  | *** |
| M,1 - C,2 == 0 | 60.329   | 9.998      | 6.034   | < 1e-04  | *** |
| M,1 - M,2 == 0 | 47.782   | 4.942      | 9.669   | < 1e-04  | *** |
| M,1 - C,3 == 0 | -66.620  | 9.173      | -7.263  | < 1e-04  | *** |
| M,1 - M,3 == 0 | -110.765 | 4.147      | -26.709 | < 1e-04  | *** |
| C,2 - M,2 == 0 | -12.548  | 9.947      | -1.261  | 0.76816  |     |
| C,2 - C,3 == 0 | -126.949 | 4.566      | -27.804 | < 1e-04  | *** |
| C,2 - M,3 == 0 | -171.094 | 9.422      | -18.159 | < 1e-04  | *** |
| M,2 - C,3 == 0 | -114.402 | 9.117      | -12.548 | < 1e-04  | *** |
| M,2 - M,3 == 0 | -158.547 | 4.011      | -39.526 | < 1e-04  | *** |
| C,3 - M,3 == 0 | -44.145  | 8.542      | -5.168  | < 1e-04  | *** |

---  
Signif. codes: 0 '\*\*\*' 0.001 '\*\*' 0.01 '\*' 0.05 '.' 0.1 ' ' 1  
(Adjusted p values reported -- single-step method)

## Peak-velocity analysis

```
#model for peak-velocity
```

```
model = lme(out_peak_vel ~ group*factor(sac_type) + factor(trial_direction) , random =  
~1|id_aaa , data = data)
```

```
summary(model)
```

```
> #model for peak-velocity  
> model = lme(out_peak_vel ~ group*factor(sac_type) + factor(trial_direction) , random = ~1|id_aaa , data =  
data)
```

```
> summary(model)
```

```
Linear mixed-effects model fit by REML
```

```
Data: data
```

```
      AIC      BIC    logLik  
27439.32 27491.51 -13710.66
```

```
Random effects:
```

```
Formula: ~1 | id_aaa
```

```
(Intercept) Residual
```

```
StdDev:    60.69536 63.41535
```

```
saccade type  
1 = pro saccade  
2 = corrective  
3 = antisaccade  
C = control  
M = Multiple Sclerosis
```

```
Fixed effects: out_peak_vel ~ group * factor(sac_type) + factor(trial_direction)
```

|                          | Value     | Std.Error | DF   | t-value   | p-value |
|--------------------------|-----------|-----------|------|-----------|---------|
| (Intercept)              | 267.41917 | 11.636172 | 2362 | 22.981713 | 0.0000  |
| groupM                   | -3.11578  | 16.008029 | 74   | -0.194639 | 0.8462  |
| factor(sac_type)2        | 59.73596  | 8.212576  | 2362 | 7.273718  | 0.0000  |
| factor(sac_type)3        | 0.51402   | 6.437047  | 2362 | 0.079853  | 0.9364  |
| factor(trial_direction)2 | -12.55383 | 2.594122  | 2362 | -4.839338 | 0.0000  |
| groupM:factor(sac_type)2 | 2.82176   | 10.621786 | 2362 | 0.265658  | 0.7905  |
| groupM:factor(sac_type)3 | 6.78688   | 8.574147  | 2362 | 0.791552  | 0.4287  |

```
Correlation:
```

|                          | (Intr) | groupM | fctr(s_)2 | fc(_)3 | fctr(t_)2 | gM:(_)2 |
|--------------------------|--------|--------|-----------|--------|-----------|---------|
| groupM                   | -0.718 |        |           |        |           |         |
| factor(sac_type)2        | -0.368 | 0.267  |           |        |           |         |
| factor(sac_type)3        | -0.494 | 0.357  | 0.663     |        |           |         |
| factor(trial_direction)2 | -0.124 | 0.015  | 0.013     | 0.028  |           |         |
| groupM:factor(sac_type)2 | 0.283  | -0.345 | -0.773    | -0.512 | 0.000     |         |
| groupM:factor(sac_type)3 | 0.372  | -0.461 | -0.498    | -0.751 | -0.031    | 0.645   |

```
Standardized Within-Group Residuals:
```

|  | Min         | Q1          | Med         | Q3         | Max         |
|--|-------------|-------------|-------------|------------|-------------|
|  | -4.82559829 | -0.49353432 | -0.02731636 | 0.40808920 | 10.12643751 |

```
Number of Observations: 2443
```

```
Number of Groups: 76
```

```
>
```

```
<
```

## Peak-velocity pairwise comparisons

```
# comparing by group*saccade type
summary(glht(model, lsm(pairwise ~ group*sac_type)))
```

```
> # comparing by group*saccade type
> summary(glht(model, lsm(pairwise ~ group*sac_type)))
Note: df set to 989
```

### Simultaneous Tests for General Linear Hypotheses

```
Fit: lme.formula(fixed = out_peak_vel ~ group * factor(sac_type) +
  factor(trial_direction), data = data, random = ~1 | id_aaa)
```

#### Linear Hypotheses:

|                | Estimate | Std. Error | t value | Pr(> t )    |
|----------------|----------|------------|---------|-------------|
| C,1 - M,1 == 0 | 3.116    | 16.008     | 0.195   | 0.99995     |
| C,1 - C,2 == 0 | -59.736  | 8.213      | -7.274  | < 0.001 *** |
| C,1 - M,2 == 0 | -59.442  | 15.949     | -3.727  | 0.00195 **  |
| C,1 - C,3 == 0 | -0.514   | 6.437      | -0.080  | 1.00000     |
| C,1 - M,3 == 0 | -4.185   | 15.342     | -0.273  | 0.99972     |
| M,1 - C,2 == 0 | -62.852  | 15.924     | -3.947  | < 0.001 *** |
| M,1 - M,2 == 0 | -62.558  | 6.738      | -9.284  | < 0.001 *** |
| M,1 - C,3 == 0 | -3.630   | 14.971     | -0.242  | 0.99984     |
| M,1 - M,3 == 0 | -7.301   | 5.661      | -1.290  | 0.74515     |
| C,2 - M,2 == 0 | 0.294    | 15.864     | 0.019   | 1.00000     |
| C,2 - C,3 == 0 | 59.222   | 6.229      | 9.508   | < 0.001 *** |
| C,2 - M,3 == 0 | 55.551   | 15.255     | 3.641   | 0.00273 **  |
| M,2 - C,3 == 0 | 58.928   | 14.907     | 3.953   | < 0.001 *** |
| M,2 - M,3 == 0 | 55.257   | 5.474      | 10.093  | < 0.001 *** |
| C,3 - M,3 == 0 | -3.671   | 14.258     | -0.257  | 0.99979     |

saccade type  
 1 = pro saccade  
 2 = corrective  
 3 = antisaccade  
 C = control  
 M = Multiple Sclerosis병

```
---
Signif. codes:  0 '***' 0.001 '**' 0.01 '*' 0.05 '.' 0.1 ' ' 1
(Adjusted p values reported -- single-step method)
```
